# Supplementary material for: A novel interaction fingerprint derived from per atom score contributions: exhaustive evaluation of interaction fingerprint performance in docking based virtual screening
Source: PubMed Central journal article supplement (PMC5856854; doi:10.1186/s13321-018-0264-0), 2018-03-16
Supplement: 13321_2018_264_MOESM1_ESM.pdf [file 13321_2018_264_MOESM1_ESM.pdf]

# **A Novel Interaction Fingerprint Derived from Per Atom Score Contributions: Exhaustive Evaluation of Interaction Fingerprint Performance in Docking Based Virtual Screening**

Julia B. Jasper<sup>1</sup> (julia.jasper@tu-dortmund.de), Lina Humbeck<sup>1</sup> (lina.humbeck@tu-dortmund.de), Tobias Brinkjost<sup>1,2</sup> (tobias.brinkjost@tu-dortmund.de), Oliver Koch<sup>1\*</sup> (oliver.koch@tu-dortmund.de)

<sup>1</sup>Faculty of Chemistry and Chemical Biology, TU Dortmund University, Otto-Hahn-Str. 6, 44227 Dortmund, Germany

<sup>2</sup>Department of Computer Science, TU Dortmund University, Otto-Hahn-Str. 14, 44227 Dortmund

## **Supplemental Material**

### **S1 – A Specific Scoring Scheme for Binding Mode Prediction**

**Overview.** In addition to the scoring scheme described in our study, we also developed another one which was especially designed for a very exact binding mode prediction rather than the relative ranking of different molecules. It does not only differentiate between favourable and unfavourable interactions but compares the quantitative strength of each pose fingerprint interaction to the respective median value of the combined references. This scoring procedure indeed showed a very good pose recovery power, so that 61 % and 80 % of the top ranked poses for the Astex diverse dataset complexes showed an RMSD below 1.0 Å and 2.0 Å, respectively. An analysis of the correlation between the RMSD of the top ranked pose and the average Tanimoto ECFP4 and MDL similarity between the reference ligands and the query molecule (Fig. S1) confirmed that scoring success does not correlate with structural similarity, as would be expected for an interaction fingerprint.

**Scoring Scheme.** The pose recovery scheme does not only differentiate between favourable and unfavourable interactions but also exploits the quantitative values in the PADIFs and uses slightly different weighting factors to weight very important interactions even stronger (10, 4, 2, 1 for a relative occurrence in > 75, 50, 30 and 0 percent of complexes, respectively) (Tab. S1). Unfavourable

interactions (case 1) lead to a negative PADIF score, with the absolute value depending on the quantitative value of the contribution and the weighting factor of the element. Missing interactions (case 4) are also penalized depending on the weighting factors. Absence of interactions which are also absent in the reference (case 2) are slightly rewarded, as well as the presence of additional interactions not present in the references (case 3). Interactions similar to the reference (case 5) are rewarded taking into account both the strength of the interaction in relation to the reference and the respective weighting factor.

Table S1. Rules for calculating the PADIF scoring in a scheme especially for binding mode prediction.

| Case | Condition                                        | Calculation of element score $S(m,n)$                                                                              |
|------|--------------------------------------------------|--------------------------------------------------------------------------------------------------------------------|
| 1    | Pose PADIF(m,n) > 0                              | $S(m,n) = (-1) \cdot \text{pose PADIF}(m,n) \cdot (1 + w(m,n))$                                                    |
| 2    | Reference PADIF(m,n) = 0,<br>Pose PADIF(m,n) = 0 | $S(m,n) = 0.2$                                                                                                     |
| 3    | Reference PADIF(m,n) = 0,<br>Pose PADIF(m,n) < 0 | $S(m,n) = \text{pose PADIF}(m,n)$ , but maximum 0.3                                                                |
| 4    | Reference PADIF(m,n) < 0,<br>Pose PADIF(m,n) = 0 | $S(m,n) = -1.2 \cdot w(m,n)$                                                                                       |
| 5    | Reference PADIF(m,n) < 0,<br>Pose PADIF(m,n) < 0 | $ratio = \frac{\text{pose PADIF}(m,n)}{\text{ref. PADIF}(m,n)}$ , but maximum 1.2<br>$S(m,n) = ratio \cdot w(m,n)$ |

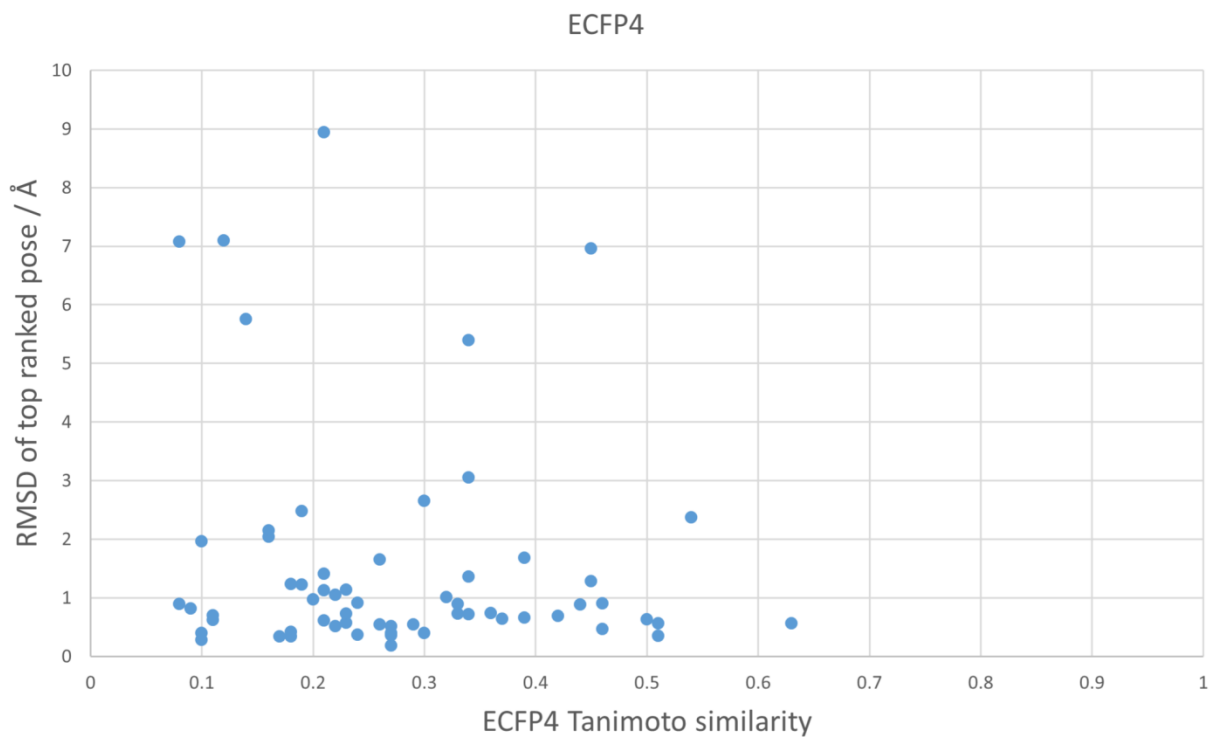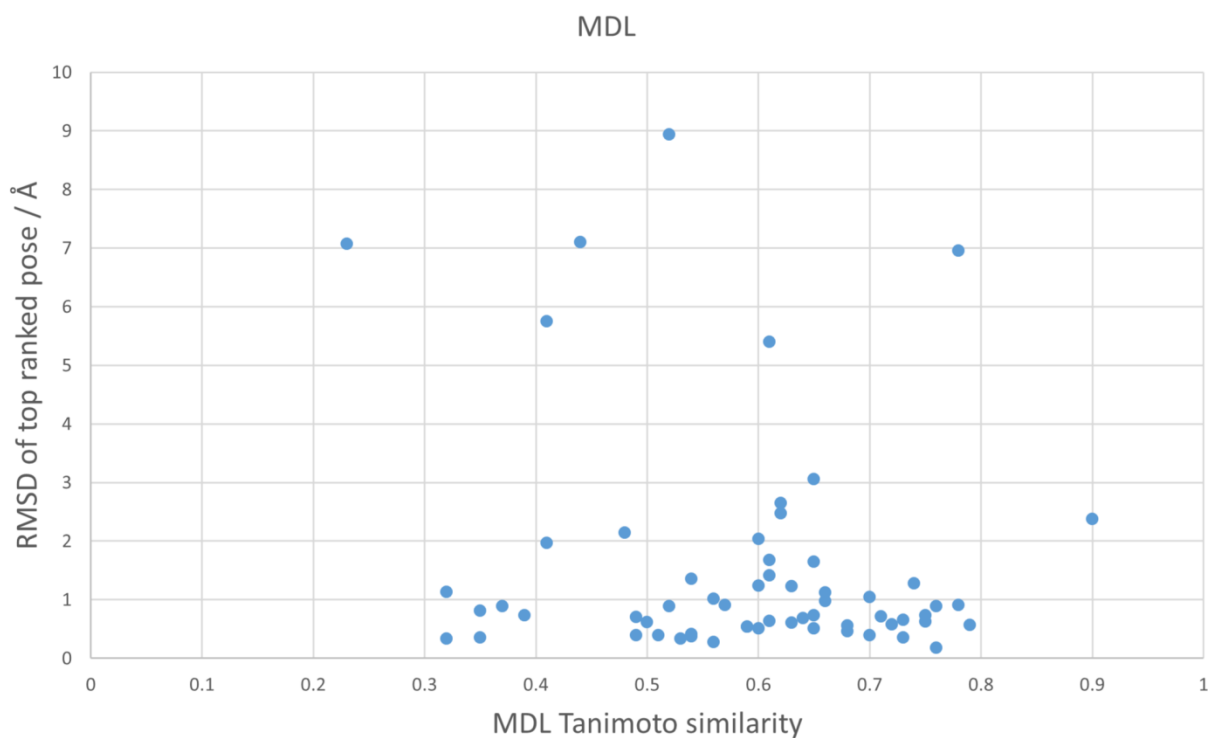

Figure S1: Correlation between RMSD and compound similarity for the Astex dataset. Plot of the RMSD value of the top ranked pose versus the respective a) average ECFP Tanimoto similarity and b) average MDL Tanimoto similarity between the query ligand and the reference ligands for the adapted pose recovery scoring.

## S2 - Reference complexes for pose recovery

Table S2: Complexes from the Astex diverse dataset with the respective reference structures and the mean ECFP4 and MDL Tanimoto similarity of the reference ligands with the query compounds.

| <b>PDB Code</b> | <b>Reference structures</b>                                      | $\bar{\Theta} T_c$ -<br><b>ECFP4</b> | $\bar{\Theta} T_c$ - <b>MDL</b> | <b>Protein</b>                                      |
|-----------------|------------------------------------------------------------------|--------------------------------------|---------------------------------|-----------------------------------------------------|
| <b>1gpk_HUP</b> | 1gpn_HUB, 3zv7_NHG                                               | $0.26 \pm 0.16$                      | $0.59 \pm 0.18$                 | acetylcholine esterase<br>(AChE)                    |
| <b>1hnn_SKF</b> | 1n7i_LY1, 1n7j_IDI,<br>2an3_CTL, 2an5_TTL,<br>3kpw_1SQ, 3kpy_ES2 | $0.23 \pm 0.14$                      | $0.32 \pm 0.06$                 | phenylethanolamine<br>N-methyltransferase<br>(PNMT) |
| <b>1hww_SWA</b> | 3dx1_YHO, 3ddf_GB6,<br>2ow6_NK1, 1tqw_BLT,<br>1qwn_GUL           | $0.10 \pm 0.06$                      | $0.56 \pm 0.11$                 | golgi $\alpha$ mannosidase II                       |
| <b>1hwi_115</b> | 2q6b_HR2, 2q6c_HR1,<br>2r4f_RIE, 3ccz_5HI,<br>1hw8_114           | $0.34 \pm 0.08$                      | $0.61 \pm 0.10$                 | HMG-CoA reductase<br>(HMGR)                         |
| <b>1ia1_TQ3</b> | 1m79_MQ1, 1m78_CLZ,<br>1m7a_MQU, 3qls_55V,<br>1ia3_TQ5, 1aoe_GW3 | $0.27 \pm 0.18$                      | $0.60 \pm 0.11$                 | dihydrofolate<br>reductase (DHFR)                   |
| <b>1ig3_VIB</b> | 2f17_PYI                                                         | 0.42                                 | 0.64                            | thiamine<br>pyrophosphokinase<br>(TPP)              |
| <b>1jd0_AZM</b> | 4ht2_V50, 4qjw_WWO,<br>4kp5_E1F, 4kp8_E1G                        | $0.16 \pm 0.02$                      | $0.60 \pm 0.06$                 | carbonic anhydrase<br>XII                           |

|                 |                                                                               |             |             |                                        |
|-----------------|-------------------------------------------------------------------------------|-------------|-------------|----------------------------------------|
| <b>1lje_BYS</b> | 1jtt_BDS, 4c1f_X8Z,<br>1dd6_MCI, 3wxc_C93                                     | 0.34 ± 0.30 | 0.54 ± 0.27 | IMP-1 metallo<br>β-lactamase           |
| <b>1jla_TNK</b> | 3drr_R8E, 1jkh_EFZ                                                            | 0.08 ± 0.01 | 0.37 ± 0.03 | HIV-1 reverse<br>transcriptase (HIVRT) |
| <b>1k3u_IAD</b> | 1kfc_IPL, 3pr2_F9F                                                            | 0.23 ± 0.13 | 0.39 ± 0.07 | tryptophane synthase                   |
| <b>1ke5_LS1</b> | 4fku_60K, 4gcj_X64                                                            | 0.23 ± 0.06 | 0.72 ± 0.06 | cyclin dependant<br>kinase II (CDKII)  |
| <b>1kzk_JE2</b> | 3e1l_DR7, 3i7e_DJR,<br>3aid_ARQ                                               | 0.18 ± 0.05 | 0.54 ± 0.02 | HIV JE-2147 protease<br>(HIVPR)        |
| <b>1l2s_STC</b> | 4kzb_NZ2, 4kza_NZ9,<br>4e3l_0NB, 4e3k_0NA                                     | 0.26 ± 0.17 | 0.65 ± 0.10 | AmpC β-lactamase                       |
| <b>1l7f_BCZ</b> | 4dgr_3LV, 1f8e_49A,<br>1f8c_4AM, 1nnc_ZMR,<br>2qwk_G39, 1bji_DPC              | 0.18 ± 0.04 | 0.53 ± 0.07 | neuraminidase (NA)                     |
| <b>1lpz_CMB</b> | 4y6d_48U, 2y81_931,<br>1lpg_IMA, 1lpk_CBB,<br>1f0s_PR2, 2boh_IIA,<br>1lqd_CMI | 0.29 ± 0.26 | 0.59 ± 0.15 | factor Xa (FXa)                        |
| <b>1mmv_3AR</b> | 1qwc_14W, 4fvw_1KJ,<br>1k2s_ARV, 5agl_CCW                                     | 0.39 ± 0.21 | 0.61 ± 0.17 | neuronal NOS heme<br>domain            |
| <b>1mzc_BNE</b> | 1s63_778, 1ld7_U66,<br>1ld8_U49                                               | 0.19 ± 0.02 | 0.62 ± 0.01 | farnesyl transferase                   |
| <b>1n1m_A3M</b> | 3vjm_W61, 2g63_AAF,<br>2g5t_ACF, 2ogz_U1N,<br>2i03_AXD                        | 0.11 ± 0.01 | 0.50 ± 0.07 | dipeptidyl peptidase<br>IV/CD26        |

|                 |                                                        |             |             |                                           |
|-----------------|--------------------------------------------------------|-------------|-------------|-------------------------------------------|
| <b>1n2v_BDI</b> | 4q4s_S98, 1r5y_DQU<br>1p0b_PQO                         | 0.11 ± 0.04 | 0.49 ± 0.03 | tRNA guanine<br>transglycosylase<br>(TGT) |
| <b>1n46_PFA</b> | 3gws_T3, 3jzc_4HY,<br>1nax_IH5, 3imy_B72,<br>1q4x_G24  | 0.27 ± 0.07 | 0.35 ± 0.02 | thyroid receptor β (TR<br>β)              |
| <b>1nav_IH5</b> | 4lnw_T3, 3jzb_4HY,<br>3ilz_B72                         | 0.44 ± 0.06 | 0.76 ± 0.09 | thyroid receptor α (TR<br>α)              |
| <b>1of1_SCT</b> | 1e2k_TMC, 4oql_F2U,<br>3f0t_NCV, 2ki5_AC2,<br>4oqm_FDU | 0.27 ± 0.10 | 0.76 ± 0.16 | thymidine kinase (TK)                     |
| <b>1oq5_CEL</b> | 2nno_M28, 2nnv_M29,<br>5byi_4WA, 3s8x_E59              | 0.24 ± 0.01 | 0.57 ± 0.07 | carbonic anhydrase II                     |
| <b>1owe_675</b> | 1owh_239, 1sqo_UI2,<br>1sqa_UI1                        | 0.51 ± 0.14 | 0.73 ± 0.10 | urokinase                                 |
| <b>1oyt_FSN</b> | 1y3w_UIP, 2cf8_ESH,<br>2zda_32U, 2zdl_45U              | 0.27 ± 0.06 | 0.70 ± 0.07 | thrombin                                  |
| <b>1p2y_NCT</b> | 2h7q_IMD, 1phd_PIW                                     | 0.09 ± 0.07 | 0.35 ± 0.11 | cytochrome P450<br>(CYP450)               |
| <b>1p62_GEO</b> | 1p5z_AR3, 3ipx_B86,<br>2a7q_CFB, 2qrn_DCM,<br>2pd4_DCN | 0.34 ± 0.18 | 0.71 ± 0.25 | deoxycytidine kinase<br>(dCK)             |
| <b>1pmn_984</b> | 3oy1_589, 4y46_4F2,<br>4z9l_880, 3ttj_JBI,<br>4kkh_1RQ | 0.18 ± 0.04 | 0.60 ± 0.06 | c-Jun terminal kinase<br>3 (JNK3)         |
| <b>1q1g_MTI</b> | 3phc_IM5, 1nw4_IMH                                     | 0.22 ± 0.02 | 0.70 ± 0.03 | purine nucleoside                         |

|                 |                                                        |             |             |                                            |
|-----------------|--------------------------------------------------------|-------------|-------------|--------------------------------------------|
|                 |                                                        |             |             | phosphorylase (PNP)                        |
| <b>1q41_IXM</b> | 4pte_2WF, 3say_OFT,<br>1q3d_STU, 1q3w_ATU,<br>1q4l_679 | 0.24 ± 0.19 | 0.54 ± 0.09 | glycogen synthase<br>kinase 3β (GSK 3β)    |
| <b>1r1h_BIR</b> | 1dmt_RDF, 2qpj_I20,<br>1y8j_STS, 1r1j_OIR              | 0.33 ± 0.14 | 0.52 ± 0.17 | neprilysin                                 |
| <b>1r58_AO5</b> | 1r5g_AO1, 1r5h_AO2                                     | 0.34 ± 0.05 | 0.65 ± 0.00 | methionine<br>aminopeptidase 2<br>(MetAP2) |
| <b>1r9o_FLP</b> | 5a5i_XI1                                               | 0.08        | 0.23        | cytochrome P450 2C9                        |
| <b>1s19_MC9</b> | 3b0t_MCZ, 3az3_DS6,<br>1ie9_VDX, 1ie8_KH1              | 0.46 ± 0.24 | 0.78 ± 0.15 | vitamin D nuclear<br>receptor (VDR)        |
| <b>1s3v_TQD</b> | 1kmv_LII, 1kms_LIH,<br>3ghw_GHW, 4g95_OAG              | 0.10 ± 0.03 | 0.49 ± 0.06 | dihydrofolate<br>reductase (DHFR)          |
| <b>1sg0_STL</b> | 3ox2_79X                                               | 0.17        | 0.32        | quinone reductase 2<br>(QR2)               |
| <b>1sj0_E4D</b> | 2iog_IOG, 1xpc_AIT,<br>1xp6_AIU, 1xp1_AIH              | 0.63 ± 0.20 | 0.79 ± 0.07 | estrogen receptor α<br>(ER)                |
| <b>1sqn_NDR</b> | 1sr7_MOF, 1a28_STR,<br>2ovh_AS0                        | 0.22 ± 0.06 | 0.65 ± 0.10 | progesterone receptor<br>(PR)              |
| <b>1t40_ID5</b> | 1mar_ZST, 2ine_PAC,<br>2inz_OHP, 1iei_ZES,<br>1ef3_FID | 0.16 ± 0.02 | 0.48 ± 0.17 | aldose reductase<br>(ALR2)                 |
| <b>1t46_STI</b> | 4u0i_OLI                                               | 0.39        | 0.73        | c-KIT tyrosine kinase                      |
| <b>1tz8_DES</b> | 4q xv_LU2, 4l1t_1WZ,                                   | 0.14 ± 0.01 | 0.41 ± 0.04 | transthyretin                              |

|                 |                                                                  |             |             |                                                     |
|-----------------|------------------------------------------------------------------|-------------|-------------|-----------------------------------------------------|
|                 | 3m1o_CJZ                                                         |             |             |                                                     |
| <b>1t9b_1CS</b> | 1t9d_1MM 1t9c_1SM,<br>1t9a_1TB, 1n0h_CIE                         | 0.54 ± 0.11 | 0.90 ± 0.02 | acetohydroxyacid<br>synthase                        |
| <b>1tow_CRZ</b> | 3fr4_F8A, 3fr5_I4A,<br>3fr2_8CA, 1tou_B1V                        | 0.21 ± 0.06 | 0.66 ± 0.13 | adipocyte fatty acid<br>binding protein<br>(A-FABP) |
| <b>1tt1_KAI</b> | 1s9t_QUS, 1sd3_SYM,<br>4H8I_11W                                  | 0.12 ± 0.02 | 0.44 ± 0.01 | GluR6-kainate<br>receptor                           |
| <b>1uml_FR4</b> | 1ndy_FR3, 1ndw_FR2,<br>1ndz_FR5, 2z7g_EH9,<br>2e1w_FR6           | 0.45 ± 0.21 | 0.78 ± 0.10 | adenosine deaminase<br>(ADA)                        |
| <b>1unl_RRC</b> | 3o0g_300, 1ung_ALH,<br>1unh_IXM                                  | 0.10 ± 0.02 | 0.41 ± 0.07 | cyclin dependant<br>kinase 5 (CDK5)                 |
| <b>1v48_HA1</b> | 1b8n_IMG, 1b8o_IMH,<br>2ai2_P1D, 2ai3_P2G,<br>2qpl_BTY           | 0.21 ± 0.11 | 0.61 ± 0.09 | purine nucleoside<br>phosphorylase (PNP)            |
| <b>1v4s_MRK</b> | 3fr0_AJB, 3goi_LOI,<br>3vev_OH4, 3vf6_OH6,<br>4no7_2N8           | 0.20 ± 0.10 | 0.66 ± 0.16 | glucokinase                                         |
| <b>1vcj_IBA</b> | 1b9s_FDI, 1b9t_RAI,<br>1b9v_RA2, 1ivb_ST1                        | 0.51 ± 0.27 | 0.68 ± 0.20 | neuraminidase (NA)                                  |
| <b>1w1p_GIO</b> | 1e6r_AMI, 1e6z_NGO,<br>1o6i_OHZ, 1w1t_CHQ,<br>1w1v_ALJ, 1w1y_TYP | 0.21 ± 0.14 | 0.63 ± 0.16 | chitinase B                                         |
| <b>1w2g_THM</b> | 1mrs_5HU, 4unq_H6D,<br>1gtv_TYD, 1e98_ATM                        | 0.45 ± 0.21 | 0.74 ± 0.18 | thymidylate kinase                                  |



|                 |                                                        |             |             |                                                              |
|-----------------|--------------------------------------------------------|-------------|-------------|--------------------------------------------------------------|
| <b>1xm6_5RM</b> | 1xm4_PIL, 1xlx_CIO,<br>1xlz_FIL, 1xn0_ROL<br>1xmu_ROF  | 0.21 ± 0.04 | 0.52 ± 0.06 | phosphodiesterase 4B<br>(PDE4B)                              |
| <b>1xoq_ROF</b> | 1y2k_7DE, 1xon_PIL,<br>4w1o_3GJ                        | 0.37 ± 0.18 | 0.61 ± 0.16 | phosphodiesterase 4D<br>(PDE4D)                              |
| <b>1y6b_AAX</b> | 1y6a_AAZ, 3vid_4TT                                     | 0.32 ± 0.24 | 0.56 ± 0.26 | vascular endothelial<br>growth factor receptor<br>2 (VEGFR2) |
| <b>1ygc_905</b> | 2bz6_346, 1w7x_413,<br>4yt6_4JY, 4zxy_4T1              | 0.30 ± 0.12 | 0.51 ± 0.08 | factor VIIa (FVIIa)                                          |
| <b>1yqy_915</b> | 5d1s_56Q, 4pku_30P,<br>4wf6_407                        | 0.50 ± 0.09 | 0.75 ± 0.03 | lethal factor                                                |
| <b>1yvf_PH7</b> | 1z4u_PH9                                               | 0.36        | 0.75        | RNA dependant RNA<br>polymerase                              |
| <b>1z95_198</b> | 2ax8_FHM                                               | 0.46        | 0.68        | androgen receptor                                            |
| <b>2bm2_PM2</b> | 2zeb_11M, 2zec_11N,<br>3v7t_0GX, 4a6l_P43              | 0.30 ± 0.12 | 0.62 ± 0.05 | beta-II tryptase                                             |
| <b>2br1_PFP</b> | 2brh_DFW, 2ydi_YDI,<br>2ym3_YM3, 3pa3_C70,<br>4qyg_3DW | 0.19 ± 0.16 | 0.63 ± 0.10 | Chk1 kinase                                                  |
| <b>2bsm_BSM</b> | 2yi7_BZ8, 4lwe_FJ2,<br>3eko_PYU                        | 0.33 ± 0.15 | 0.65 ± 0.12 | heat shock protein 90<br>(HSP90)                             |

### S3 - Reference Complexes for Virtual Screening

Table S3: PDB Codes of the complexes used for docking and the reference complexes of PADIF based scoring together with the respective average ECFP4 and MDL Tanimoto similarities between 1) all reference ligands and all active molecules (Ref/A), 2) all reference ligands and all decoy molecules (Ref/D), 3) between all active molecules (A/A) and 4) between all decoy and active molecules (A/D).

| <b>PDB Code</b> | <b>Reference structure</b>                                                                                                                 | <b><math>\bar{\phi} T_c</math>-ECFP4</b>                                                         | <b><math>\bar{\phi} T_c</math>-MDL</b>                                                           | <b>Protein</b>                            |
|-----------------|--------------------------------------------------------------------------------------------------------------------------------------------|--------------------------------------------------------------------------------------------------|--------------------------------------------------------------------------------------------------|-------------------------------------------|
| 1o86            | 1uze_EAL,<br>1uzf_MCO,<br>2oc2_RX3, 4bzs_K26                                                                                               | Ref/A: $0.14 \pm 0.17$<br>Ref/D: $0.11 \pm 0.17$<br>A/A: $0.27 \pm 0.15$<br>A/D: $0.15 \pm 0.05$ | Ref/A: $0.19 \pm 0.06$<br>Ref/D: $0.19 \pm 0.04$<br>A/A: $0.57 \pm 0.14$<br>A/D: $0.48 \pm 0.09$ | angiotensin<br>converting<br>enzyme (ACE) |
| 1acj            | 1acl_DME,<br>1ax9_EDR,<br>1e3q_EBW,<br>1gpk_HUP,<br>1gqr_SAF,<br>1acj_THA,<br>2c58_AT3,<br>2j3q_TFL,<br>3zv7_NHG,<br>5bwc_HBP,<br>1e66_HUX | Ref/A: $0.07 \pm 0.04$<br>Ref/D: $0.07 \pm 0.04$<br>A/A: $0.30 \pm 0.18$<br>A/D: $0.15 \pm 0.06$ | Ref/A: $0.38 \pm 0.09$<br>Ref/D: $0.38 \pm 0.08$<br>A/A: $0.58 \pm 0.18$<br>A/D: $0.53 \pm 0.11$ | acetylcholine<br>esterase (AChE)          |
| 1ndw            | 1ndw_FR2,<br>1v7a_FRC,                                                                                                                     | Ref/A: $0.15 \pm 0.11$<br>Ref/D: $0.10 \pm 0.03$                                                 | Ref/A: $0.57 \pm 0.08$                                                                           | adenosine<br>deaminase                    |

|      |                                                                                                               |                                                                                                  |                                                                                                  |                                      |
|------|---------------------------------------------------------------------------------------------------------------|--------------------------------------------------------------------------------------------------|--------------------------------------------------------------------------------------------------|--------------------------------------|
|      | 1v79_FR7,<br>1wxz_FRL,<br>2z7g_EH9                                                                            | A/A: $0.22 \pm 0.16$<br>A/D: $0.09 \pm 0.06$                                                     | Ref/D: $0.43 \pm 0.10$<br>A/A: $0.62 \pm 0.18$<br>A/D: $0.44 \pm 0.13$                           | (ADA)                                |
| 1ah3 | 1eko_I84, 1ah3_TOL                                                                                            | Ref/A: $0.11 \pm 0.03$<br>Ref/D: $0.12 \pm 0.04$<br>A/A: $0.18 \pm 0.18$<br>A/D: $0.11 \pm 0.04$ | Ref/A: $0.39 \pm 0.08$<br>Ref/D: $0.37 \pm 0.06$<br>A/A: $0.48 \pm 0.18$<br>A/D: $0.42 \pm 0.09$ | aldose reductase<br>(ALR2)           |
| 1xgj | 1l2s_STC, 4jxs_18U,<br>4jxv_1MU                                                                               | Ref/A: $0.32 \pm 0.13$<br>Ref/D: $0.13 \pm 0.05$<br>A/A: $0.37 \pm 0.17$<br>A/D: $0.17 \pm 0.06$ | Ref/A: $0.73 \pm 0.15$<br>Ref/D: $0.46 \pm 0.12$<br>A/A: $0.71 \pm 0.20$<br>A/D: $0.46 \pm 0.13$ | AmpC<br>$\beta$ -lactamase<br>(AmpC) |
| 2ao6 | 1e3g_R18,<br>1t7r_DHT,<br>2am9_TES,<br>2amb_17H,<br>2ax9_BHM,<br>2axa_FHM,<br>2ihq_LG7,<br>3v4a_PK1, 3v49_PK0 | Ref/A: $0.15 \pm 0.13$<br>Ref/D: $0.09 \pm 0.04$<br>A/A: $0.20 \pm 0.16$<br>A/D: $0.10 \pm 0.04$ | Ref/A: $0.45 \pm 0.22$<br>Ref/D: $0.37 \pm 0.12$<br>A/A: $0.50 \pm 0.22$<br>A/D: $0.36 \pm 0.11$ | androgen<br>receptor (AR)            |
| 1ckp | 1h00_FAP,<br>2b55_D31, 2r3f_SC8,                                                                              | Ref/A: $0.11 \pm 0.07$<br>Ref/D: $0.11 \pm 0.04$                                                 | Ref/A: $0.47 \pm 0.09$                                                                           | cyclin dependant<br>kinase II        |

|      |                                                                                                            |                                                                                  |                                                                                        |                                                           |
|------|------------------------------------------------------------------------------------------------------------|----------------------------------------------------------------------------------|----------------------------------------------------------------------------------------|-----------------------------------------------------------|
|      | 2r3q_5SC, 3rpr_25Z,<br>4bzd_D6I,<br>4ek4_1CK, 4fkt_48K,<br>4gcj_X64                                        | A/A: 0.11 ± 0.09<br>A/D: 0.10 ± 0.04                                             | Ref/D: 0.44 ±<br>0.09<br>A/A: 0.48 ± 0.11<br>A/D: 0.46 ± 0.09                          | (CDK2)                                                    |
| 1h1d | 1jr4_CL4,<br>1vid_DNC, 2cl5_BIE,<br>3hvj_705, 3s68_TCW                                                     | Ref/A: 0.19 ± 0.09<br>Ref/D: 0.12 ± 0.06<br>A/A: 0.29 ± 0.22<br>A/D: 0.12 ± 0.05 | Ref/A: 0.42 ±<br>0.14<br>Ref/D: 0.44 ±<br>0.11<br>A/A: 0.51 ± 0.17<br>A/D: 0.33 ± 0.12 | catechol O-<br>methyl-<br>transferase<br>(COMT)           |
| 1q4g | 1eqg_IBP, 1ht8_34C,<br>1pth_SAL,<br>1q4g_BFL,<br>2ayl_FLP, 2oyu_IMS,<br>3kk6_CEL,<br>3n8y_DIF,<br>4o1z_MXM | Ref/A: 0.15 ± 0.07<br>Ref/D: 0.13 ± 0.04<br>A/A: 0.18 ± 0.13<br>A/D: 0.16 ± 0.05 | Ref/A: 0.34 ±<br>0.12<br>Ref/D: 0.32 ±<br>0.10<br>A/A: 0.39 ± 0.15<br>A/D: 0.39 ± 0.11 | prostaglandin<br>H(2) synthase-1<br>(containing<br>COX-1) |
| 1cx2 | 4cox_IMN, 6cox_S58                                                                                         | Ref/A: 0.19 ± 0.14<br>Ref/D: 0.11 ± 0.04<br>A/A: 0.21 ± 0.10<br>A/D: 0.11 ± 0.04 | Ref/A: 0.51 ±<br>0.19<br>Ref/D: 0.47 ±<br>0.09<br>A/A: 0.56 ± 0.15<br>A/D: 0.42 ± 0.11 | cyclooxygenase<br>2 (COX-2)                               |
| 3dfr | 1bzf_TMQ,<br>1dis_BDM,<br>2hm9_TRR,                                                                        | Ref/A: 0.22 ± 0.09<br>Ref/D: 0.11 ± 0.03<br>A/A: 0.24 ± 0.10                     | Ref/A: 0.65 ±<br>0.07<br>Ref/D: 0.47 ±                                                 | dihydrofolate<br>reductase<br>(DHFR)                      |

|      |                                                                                                                      |                                                                                                  |                                                                                                  |                                                   |
|------|----------------------------------------------------------------------------------------------------------------------|--------------------------------------------------------------------------------------------------|--------------------------------------------------------------------------------------------------|---------------------------------------------------|
|      | 3dfr_MTX                                                                                                             | A/D: $0.11 \pm 0.05$                                                                             | 0.08<br>A/A: $0.68 \pm 0.09$<br>A/D: $0.44 \pm 0.10$                                             |                                                   |
| 1m17 | 1m17_AQ4,<br>2ity_IRE, 2j6m_AEE,<br>2rgp_HYZ,<br>3bel_POX, 3poz_03P,<br>3w2s_W2R,<br>4g5j_0WN,<br>4i23_1C9, 5cav_4ZQ | Ref/A: $0.18 \pm 0.07$<br>Ref/D: $0.11 \pm 0.03$<br>A/A: $0.29 \pm 0.14$<br>A/D: $0.11 \pm 0.04$ | Ref/A: $0.50 \pm 0.09$<br>Ref/D: $0.44 \pm 0.09$<br>A/A: $0.56 \pm 0.12$<br>A/D: $0.41 \pm 0.09$ | epidermal<br>growth factor<br>receptor (EGFR)     |
| 2p15 | 2qgt_EED,<br>2p15_EZT                                                                                                | Ref/A: $0.25 \pm 0.15$<br>Ref/D: $0.09 \pm 0.03$<br>A/A: $0.22 \pm 0.16$<br>A/D: $0.09 \pm 0.04$ | Ref/A: $0.57 \pm 0.18$<br>Ref/D: $0.30 \pm 0.08$<br>A/A: $0.53 \pm 0.20$<br>A/D: $0.28 \pm 0.10$ | estrogen<br>receptor $\alpha$ (ER,<br>agonist)    |
| 1sj0 | 1sj0_E4D,<br>2bj4_OHT, 3erd_DES                                                                                      | Ref/A: $0.20 \pm 0.08$<br>Ref/D: $0.11 \pm 0.04$<br>A/A: $0.28 \pm 0.18$<br>A/D: $0.12 \pm 0.04$ | Ref/A: $0.50 \pm 0.17$<br>Ref/D: $0.37 \pm 0.10$<br>A/A: $0.67 \pm 0.16$<br>A/D: $0.46 \pm 0.10$ | estrogen<br>receptor $\alpha$ (ER,<br>antagonist) |
| 1agw | 1agw_SU2,<br>1fgi_SU1,<br>3wj6_LWJ,                                                                                  | Ref/A: $0.12 \pm 0.05$<br>Ref/D: $0.13 \pm 0.04$<br>A/A: $0.26 \pm 0.20$                         | Ref/A: $0.53 \pm 0.10$<br>Ref/D: $0.49 \pm$                                                      | fibroblast<br>growth factor<br>receptor 1         |

|      |                                                                                        |                                                                                                  |                                                                                                  |                                                           |
|------|----------------------------------------------------------------------------------------|--------------------------------------------------------------------------------------------------|--------------------------------------------------------------------------------------------------|-----------------------------------------------------------|
|      | 4uwb_JVT,<br>4uwc_4YO,<br>4wun_66T,<br>4zsa_4UT, 5am6_380                              | A/D: $0.11 \pm 0.03$                                                                             | 0.09<br>A/A: $0.63 \pm 0.15$<br>A/D: $0.49 \pm 0.09$                                             | (FGFR1)                                                   |
| 1lpg | 1lpg_IMA,<br>1nfw_RRR,<br>1z6e_IK8, 2pr3_237,<br>2xc4_IVK,<br>3cen_FXA,<br>3q3k_D90    | Ref/A: $0.13 \pm 0.08$<br>Ref/D: $0.11 \pm 0.04$<br>A/A: $0.33 \pm 0.19$<br>A/D: $0.12 \pm 0.04$ | Ref/A: $0.51 \pm 0.11$<br>Ref/D: $0.50 \pm 0.09$<br>A/A: $0.63 \pm 0.16$<br>A/D: $0.47 \pm 0.09$ | factor Xa (FXa)                                           |
| 1c2t | 1c2t_NHS,<br>1c3e_NHR1cde_DZF,<br>1gar_U89, 1jxx_138,                                  | Ref/A: $0.23 \pm 0.09$<br>Ref/D: $0.14 \pm 0.07$<br>A/A: $0.46 \pm 0.11$<br>A/D: $0.19 \pm 0.12$ | Ref/A: $0.64 \pm 0.10$<br>Ref/D: $0.53 \pm 0.11$<br>A/A: $0.84 \pm 0.08$<br>A/D: $0.54 \pm 0.13$ | glycinamide<br>ribonucleotide<br>transformylase<br>(GART) |
| 1a8i | 1a8i_GLS,<br>1b4d_CRA,<br>1ftw_GL5,<br>1k06_BZD,<br>1ww2_NBG,<br>1ww3_NTF,<br>2qn8_NBY | Ref/A: $0.31 \pm 0.14$<br>Ref/D: $0.14 \pm 0.08$<br>A/A: $0.32 \pm 0.16$<br>A/D: $0.13 \pm 0.09$ | Ref/A: $0.62 \pm 0.14$<br>Ref/D: $0.51 \pm 0.11$<br>A/A: $0.61 \pm 0.16$<br>A/D: $0.43 \pm 0.13$ | glycogen<br>phosphorylase b<br>(GPb)                      |
| 1m2z | 3cld_GW6,<br>1m2z_DEX,<br>4udd_CV7,                                                    | Ref/A: $0.11 \pm 0.08$<br>Ref/D: $0.8 \pm 0.02$<br>A/A: $0.26 \pm 0.21$                          | Ref/A: $0.44 \pm 0.13$<br>Ref/D: $0.31 \pm$                                                      | glucocorticoid<br>receptor (GR)                           |

|      |                                                                                                                                   |                                                                                                  |                                                                                                  |                                           |
|------|-----------------------------------------------------------------------------------------------------------------------------------|--------------------------------------------------------------------------------------------------|--------------------------------------------------------------------------------------------------|-------------------------------------------|
|      | 4p6w_MOF                                                                                                                          | A/D: $0.09 \pm 0.03$                                                                             | 0.07<br>A/A: $0.59 \pm 0.21$<br>A/D: $0.36 \pm 0.09$                                             |                                           |
| 1hpx | 1ajx_AH1,<br>1g35_AHF,<br>1hbv_GAN,<br>1npv_L27,<br>1ohr_1UN,<br>1upj_U01, 1x15_190,<br>1yt9_OIS, 4hla_017,<br>7upj_INU, 2qnq_QN3 | Ref/A: $0.16 \pm 0.10$<br>Ref/D: $0.12 \pm 0.03$<br>A/A: $0.25 \pm 0.19$<br>A/D: $0.13 \pm 0.04$ | Ref/A: $0.48 \pm 0.13$<br>Ref/D: $0.47 \pm 0.10$<br>A/A: $0.52 \pm 0.18$<br>A/D: $0.49 \pm 0.11$ | HIV-1 protease<br>(HIVPR)                 |
| 1rt1 | 1rt1_MKC,<br>3dya_PZL,<br>4ncg_2KW, 3ffi_30B,<br>1c0t_BM1, 1dtc_FTC,<br>1tkc_H12, 1rti_HEF                                        | Ref/A: $0.12 \pm 0.10$<br>Ref/D: $0.10 \pm 0.03$<br>A/A: $0.12 \pm 0.10$<br>A/D: $0.11 \pm 0.04$ | Ref/A: $0.43 \pm 0.12$<br>Ref/D: $0.43 \pm 0.08$<br>A/A: $0.39 \pm 0.13$<br>A/D: $0.40 \pm 0.09$ | HIV-1 reverse<br>transcriptase<br>(HIVRT) |
| 1hw8 | 1hw8_114, 1hwi_115,<br>1hwj_116, 3cct_3HI,<br>3cd0_6HI, 2q6b_HR2                                                                  | Ref/A: $0.18 \pm 0.14$<br>Ref/D: $0.11 \pm 0.02$<br>A/A: $0.38 \pm 0.25$<br>A/D: $0.10 \pm 0.02$ | Ref/A: $0.48 \pm 0.17$<br>Ref/D: $0.45 \pm 0.10$<br>A/A: $0.70 \pm 0.22$<br>A/D: $0.36 \pm 0.08$ | HMG-CoA<br>reductase<br>(HMGR)            |
| 1uy6 | 2yi0_Yi0, 2yi7_BZ8,<br>3b27_B2T,<br>3bm9_BXZ,                                                                                     | Ref/A: $0.20 \pm 0.14$<br>Ref/D: $0.10 \pm 0.04$<br>A/A: $0.25 \pm 0.20$                         | Ref/A: $0.51 \pm 0.14$<br>Ref/D: $0.40 \pm$                                                      | heat shock<br>protein 90                  |

|      |                                                                                                            |                                                                                                  |                                                                                                  |                                   |
|------|------------------------------------------------------------------------------------------------------------|--------------------------------------------------------------------------------------------------|--------------------------------------------------------------------------------------------------|-----------------------------------|
|      | 3eko_PYU,<br>3o0i_P54, 4lwe_FJ2,<br>4lwg_FJ4                                                               | A/D: $0.10 \pm 0.04$                                                                             | 0.09<br>A/A: $0.59 \pm 0.17$<br>A/D: $0.46 \pm 0.08$                                             | (HSP90)                           |
| 1p44 | 1p44_GEQ,<br>3fne_8PC,<br>4cod_KV1,<br>4d0s_9G4,<br>4r9s_3KY, 4tzk_641,<br>4u0j_566, 4u0k_744,<br>4uvi_KXU | Ref/A: $0.13 \pm 0.11$<br>Ref/D: $0.12 \pm 0.04$<br>A/A: $0.22 \pm 0.20$<br>A/D: $0.11 \pm 0.04$ | Ref/A: $0.46 \pm 0.14$<br>Ref/D: $0.46 \pm 0.10$<br>A/A: $0.51 \pm 0.19$<br>A/D: $0.44 \pm 0.09$ | enoyl reductase<br>(InhA)         |
| 2aa2 | 2a3i_C0R, 2aa2_AS4,<br>2aa5_STR, 2aa7_1CA                                                                  | Ref/A: $0.32 \pm 0.14$<br>Ref/D: $0.13 \pm 0.07$<br>A/A: $0.24 \pm 0.19$<br>A/D: $0.12 \pm 0.06$ | Ref/A: $0.71 \pm 0.17$<br>Ref/D: $0.40 \pm 0.15$<br>A/A: $0.62 \pm 0.19$<br>A/D: $0.39 \pm 0.14$ | mineralcorticoid<br>receptor (MR) |
| 1a4g | 1a4g_ZMR,<br>1a4q_DPC,<br>1nsc_SIA, 1nsd_DAN                                                               | Ref/A: $0.20 \pm 0.07$<br>Ref/D: $0.11 \pm 0.04$<br>A/A: $0.36 \pm 0.21$<br>A/D: $0.12 \pm 0.05$ | Ref/A: $0.55 \pm 0.08$<br>Ref/D: $0.45 \pm 0.09$<br>A/A: $0.64 \pm 0.16$<br>A/D: $0.43 \pm 0.08$ | neuraminidase<br>(NA)             |
| 1wbv | 1w82_L10,<br>1wbv_LI3, 2yis_YIS,<br>3hv6_R39,<br>3nnw_EDD                                                  | Ref/A: $0.09 \pm 0.06$<br>Ref/D: $0.11 \pm 0.04$<br>A/A: $0.19 \pm 0.12$<br>A/D: $0.11 \pm 0.05$ | Ref/A: $0.46 \pm 0.10$<br>Ref/D: $0.45 \pm 0.09$                                                 | P38 MAP kinase<br>(P38)           |



|      |                                                              |                                                                                                  |                                                                                                  |                                                                      |
|------|--------------------------------------------------------------|--------------------------------------------------------------------------------------------------|--------------------------------------------------------------------------------------------------|----------------------------------------------------------------------|
|      |                                                              |                                                                                                  | A/A: $0.50 \pm 0.11$<br>A/D: $0.45 \pm 0.09$                                                     |                                                                      |
| 1efy | 1efy_BZC,<br>1pax_DHQ,<br>2pax_4AN,<br>3pax_3MB,<br>4pax_NU1 | Ref/A: $0.20 \pm 0.09$<br>Ref/D: $0.14 \pm 0.05$<br>A/A: $0.42 \pm 0.17$<br>A/D: $0.12 \pm 0.04$ | Ref/A: $0.45 \pm 0.10$<br>Ref/D: $0.43 \pm 0.11$<br>A/A: $0.74 \pm 0.15$<br>A/D: $0.45 \pm 0.09$ | poly (ADP-ribose) polymerase (PARP)                                  |
| 1xp0 | 1tbf_VIA, 1xoz_CIA,<br>1xp0_VDN                              | Ref/A: $0.18 \pm 0.12$<br>Ref/D: $0.12 \pm 0.04$<br>A/A: $0.13 \pm 0.09$<br>A/D: $0.11 \pm 0.04$ | Ref/A: $0.61 \pm 0.15$<br>Ref/D: $0.58 \pm 0.09$<br>A/A: $0.55 \pm 0.11$<br>A/D: $0.50 \pm 0.11$ | phosphodiesterase 5a (PDE5)                                          |
| 1b8o | 1b8n_IMG,<br>1b8o_IMH,<br>2ai1_P1G,<br>2qpl_BTY, 3fuc_9DG    | Ref/A: $0.21 \pm 0.10$<br>Ref/D: $0.10 \pm 0.04$<br>A/A: $0.31 \pm 0.21$<br>A/D: $0.11 \pm 0.04$ | Ref/A: $0.63 \pm 0.08$<br>Ref/D: $0.50 \pm 0.08$<br>A/A: $0.71 \pm 0.14$<br>A/D: $0.50 \pm 0.10$ | purine nucleoside phosphorylase (PNP)                                |
| 4yt1 | 2pob_GW4,<br>4jl4_AXY, 1k74_544                              | Ref/A: $0.29 \pm 0.10$<br>Ref/D: $0.16 \pm 0.04$<br>A/A: $0.47 \pm 0.18$<br>A/D: $0.16 \pm 0.05$ | Ref/A: $0.48 \pm 0.18$<br>Ref/D: $0.45 \pm 0.13$<br>A/A: $0.71 \pm 0.15$<br>A/D: $0.53 \pm 0.09$ | peroxisome proliferator activated receptor $\gamma$ (PPAR $\gamma$ ) |

|      |                                                              |                                                                                                  |                                                                                                  |                                                    |
|------|--------------------------------------------------------------|--------------------------------------------------------------------------------------------------|--------------------------------------------------------------------------------------------------|----------------------------------------------------|
| 1sr7 | 1a28_STR,<br>1sqn_NDR,<br>1sr7_MOF,<br>1zuc_T98,<br>3d90_NOG | Ref/A: $0.14 \pm 0.12$<br>Ref/D: $0.08 \pm 0.03$<br>A/A: $0.29 \pm 0.23$<br>A/D: $0.09 \pm 0.03$ | Ref/A: $0.41 \pm 0.19$<br>Ref/D: $0.31 \pm 0.11$<br>A/A: $0.58 \pm 0.26$<br>A/D: $0.37 \pm 0.09$ | progesterone<br>receptor (PR)                      |
| 1mvc | 1mvc_BM6,<br>2p1t_3TN, 3fug_2E3,<br>4rmd_3SW                 | Ref/A: $0.27 \pm 0.03$<br>Ref/D: $0.12 \pm 0.05$<br>A/A: $0.54 \pm 0.17$<br>A/D: $0.16 \pm 0.05$ | Ref/A: $0.52 \pm 0.12$<br>Ref/D: $0.39 \pm 0.10$<br>A/A: $0.69 \pm 0.13$<br>A/D: $0.40 \pm 0.08$ | retinoid X<br>receptor                             |
| 1a7a | 1a7a_ADC                                                     | Ref/A: $0.43 \pm 0.14$<br>Ref/D: $0.10 \pm 0.08$<br>A/A: $0.37 \pm 0.17$<br>A/D: $0.11 \pm 0.07$ | Ref/A: $0.80 \pm 0.08$<br>Ref/D: $0.50 \pm 0.10$<br>A/A: $0.78 \pm 0.09$<br>A/D: $0.51 \pm 0.11$ | S-adenosyl-<br>homocysteine<br>hydrolase<br>(SAHH) |
| 1y57 | 1y57_MPZ                                                     | Ref/A: $0.15 \pm 0.05$<br>Ref/D: $0.08 \pm 0.02$<br>A/A: $0.22 \pm 0.19$<br>A/D: $0.11 \pm 0.04$ | Ref/A: $0.53 \pm 0.12$<br>Ref/D: $0.45 \pm 0.07$<br>A/A: $0.57 \pm 0.16$<br>A/D: $0.46 \pm 0.09$ | cellular sarcoma<br>tyrosine kinase<br>(c-SRC)     |
| 1ba8 | 1a4w_QWE,                                                    | Ref/A: $0.13 \pm 0.07$                                                                           | Ref/A: $0.47 \pm$                                                                                | thrombin                                           |

|      |                                                                     |                                                                                                  |                                                                                                        |                                                                    |
|------|---------------------------------------------------------------------|--------------------------------------------------------------------------------------------------|--------------------------------------------------------------------------------------------------------|--------------------------------------------------------------------|
|      | 1c5n_ESI, 1o2g_696,<br>4lxb_7R9                                     | Ref/D: $0.14 \pm 0.03$<br>A/A: $0.22 \pm 0.19$<br>A/D: $0.13 \pm 0.05$                           | 0.21<br>Ref/D: $0.43 \pm$<br>0.16<br>A/A: $0.57 \pm 0.16$<br>A/D: $0.51 \pm 0.12$                      |                                                                    |
| 1kim | 1e2i_APS, 1e2i_ARP,<br>1e2k_TMC,<br>1qhi_BPG, 4ivq_I43,<br>4jbx_SK7 | Ref/A: $0.15 \pm 0.09$<br>Ref/D: $0.11 \pm 0.06$<br>A/A: $0.32 \pm 0.19$<br>A/D: $0.13 \pm 0.09$ | Ref/A: $0.59 \pm$<br>0.14<br>Ref/D: $0.47 \pm$<br>0.12<br>A/A: $0.74 \pm 0.14$<br>A/D: $0.52 \pm 0.15$ | thymidine kinase<br>(TK)                                           |
| 1bjv | 1c1q_BAI,<br>1gi0_BMZ,<br>1zzz_OIV, 1pph_OZG,<br>1k1i_FD1           | Ref/A: $0.24 \pm 0.20$<br>Ref/D: $0.12 \pm 0.04$<br>A/A: $0.35 \pm 0.25$<br>A/D: $0.13 \pm 0.05$ | Ref/A: $0.57 \pm$<br>0.25<br>Ref/D: $0.39 \pm$<br>0.08<br>A/A: $0.65 \pm 0.24$<br>A/D: $0.52 \pm 0.12$ | trypsin                                                            |
| 4ag8 | 2xir_00J, 3wzd_LEV,<br>3wze_BAX,<br>4ag8_AXI, 5ew3_5T2              | Ref/A: $0.13 \pm 0.07$<br>Ref/D: $0.13 \pm 0.04$<br>A/A: $0.13 \pm 0.10$<br>A/D: $0.11 \pm 0.04$ | Ref/A: $0.46 \pm$<br>0.10<br>Ref/D: $0.48 \pm$<br>0.08<br>A/A: $0.46 \pm 0.11$<br>A/D: $0.44 \pm 0.09$ | vascular<br>endothelial<br>growth factor<br>receptor 2<br>(VEGFR2) |

## S4 - Analysis of dataset diversity

For all ligand datasets, the pairwise ECFP4 [1] Tanimoto similarities were calculated using PipelinePilot [2].

|                                  | < 0.1 | < 0.2 | < 0.3 | < 0.4 | < 0.5 | < 0.6 | < 0.7 | < 0.8 | < 0.9 | < 1 | 1   |
|----------------------------------|-------|-------|-------|-------|-------|-------|-------|-------|-------|-----|-----|
| <b>Nuclear Hormone Receptors</b> |       |       |       |       |       |       |       |       |       |     |     |
| AR                               | 24.5  | 41.2  | 14.3  | 6.7   | 4.2   | 5.9   | 2.0   | 0.7   | 0.1   | 0.0 | 0.3 |
| ER (ag.)                         | 20.7  | 41.8  | 16.1  | 8.1   | 5.4   | 3.9   | 2.1   | 1.1   | 0.3   | 0.0 | 0.4 |
| ER (ant.)                        | 3.4   | 49.9  | 12.4  | 11.1  | 9.2   | 6.1   | 3.8   | 2.8   | 1.3   | 0.0 | 0.0 |
| GR                               | 39.1  | 13.3  | 7.0   | 10.3  | 14.9  | 6.5   | 4.3   | 3.7   | 0.8   | 0.0 | 0.1 |
| MR                               | 17.1  | 23.8  | 24.8  | 15.2  | 6.7   | 6.7   | 2.9   | 1.0   | 0.0   | 0.0 | 1.9 |
| PPARg                            | 0.9   | 12.3  | 5.5   | 10.2  | 27.8  | 19.3  | 12.5  | 9.1   | 2.3   | 0.2 | 0.0 |
| PR                               | 43.0  | 2.0   | 19.7  | 2.0   | 6.3   | 16.2  | 9.4   | 1.1   | 0.3   | 0.0 | 0.0 |
| RXRa                             | 0.0   | 0.0   | 8.9   | 17.9  | 8.4   | 27.4  | 15.3  | 18.9  | 3.2   | 0.0 | 0.0 |
| <b>Kinases</b>                   |       |       |       |       |       |       |       |       |       |     |     |
| CDK2                             | 57.6  | 29.8  | 5.6   | 2.5   | 2.0   | 1.1   | 0.9   | 0.6   | 0.0   | 0.0 | 0.0 |
| EGFR                             | 3.0   | 27.3  | 27.7  | 20.1  | 14.1  | 5.2   | 1.8   | 0.6   | 0.2   | 0.0 | 0.0 |
| FGFR1                            | 26.8  | 25.5  | 12.1  | 12.2  | 8.1   | 6.2   | 5.6   | 2.7   | 0.6   | 0.2 | 0.0 |
| HSP90                            | 22.8  | 31.9  | 8.7   | 6.9   | 13.0  | 4.0   | 5.8   | 5.8   | 1.1   | 0.0 | 0.0 |
| P38                              | 22.6  | 25.7  | 26.6  | 11.3  | 6.7   | 3.8   | 2.3   | 0.7   | 0.1   | 0.0 | 0.1 |
| SRC                              | 35.6  | 28.2  | 7.5   | 9.1   | 7.0   | 5.5   | 4.5   | 2.1   | 0.4   | 0.1 | 0.0 |
| TK                               | 0.9   | 42.9  | 8.2   | 16.9  | 13.9  | 5.6   | 8.7   | 3.0   | 0.0   | 0.0 | 0.0 |
| VEGFR2                           | 45.4  | 43.5  | 5.8   | 2.1   | 1.3   | 0.8   | 0.4   | 0.6   | 0.0   | 0.0 | 0.0 |
| <b>Serine Proteases</b>          |       |       |       |       |       |       |       |       |       |     |     |
| Fxa                              | 8.1   | 20.0  | 23.8  | 9.7   | 14.5  | 11.7  | 7.7   | 3.3   | 1.0   | 0.1 | 0.0 |
| thrombin                         | 17.9  | 26.1  | 6.5   | 3.4   | 10.5  | 14.8  | 14.2  | 4.2   | 2.1   | 0.2 | 0.1 |
| trypsin                          | 14.2  | 24.4  | 2.9   | 4.0   | 15.9  | 15.3  | 13.1  | 7.2   | 2.4   | 0.3 | 0.3 |
| <b>Metalloenzymes</b>            |       |       |       |       |       |       |       |       |       |     |     |
| ACE                              | 0.9   | 33.3  | 39.0  | 13.4  | 6.5   | 2.7   | 0.8   | 2.1   | 0.1   | 0.0 | 1.2 |
| ADA                              | 27.7  | 25.7  | 10.7  | 3.6   | 22.9  | 4.7   | 4.7   | 0.0   | 0.0   | 0.0 | 0.0 |
| COMT                             | 14.5  | 30.9  | 25.5  | 1.8   | 14.5  | 1.8   | 0.0   | 5.5   | 3.6   | 0.0 | 1.8 |
| PDE5                             | 40.5  | 44.4  | 6.8   | 4.5   | 1.5   | 1.1   | 0.9   | 0.4   | 0.0   | 0.0 | 0.0 |
| <b>Folate Enzymes</b>            |       |       |       |       |       |       |       |       |       |     |     |
| DHFR                             | 0.0   | 27.2  | 39.2  | 17.2  | 9.6   | 4.1   | 1.8   | 0.8   | 0.1   | 0.0 | 0.0 |
| GART                             | 0.0   | 0.0   | 0.0   | 21.0  | 38.1  | 16.7  | 10.5  | 10.0  | 1.9   | 0.5 | 1.4 |
| <b>Other Enzymes</b>             |       |       |       |       |       |       |       |       |       |     |     |
| ACHe                             | 21.0  | 17.1  | 10.8  | 22.5  | 14.3  | 7.0   | 4.4   | 2.5   | 0.5   | 0.0 | 0.0 |
| ALR2                             | 35.4  | 48.0  | 5.2   | 2.2   | 2.8   | 1.8   | 1.8   | 0.3   | 0.6   | 0.0 | 1.8 |
| AmpC                             | 0.0   | 20.0  | 18.1  | 15.7  | 17.1  | 16.2  | 7.1   | 5.2   | 0.5   | 0.0 | 0.0 |
| COX-1                            | 13.3  | 54.7  | 22.0  | 6.0   | 1.3   | 0.3   | 0.0   | 1.3   | 0.3   | 0.0 | 0.7 |
| COX-2                            | 12.3  | 33.4  | 33.5  | 12.7  | 4.0   | 2.2   | 1.3   | 0.4   | 0.1   | 0.0 | 0.0 |
| GPB                              | 9.0   | 9.3   | 32.7  | 21.3  | 15.0  | 6.7   | 4.4   | 1.3   | 0.0   | 0.0 | 0.4 |
| HIVPR                            | 10.2  | 48.1  | 9.8   | 8.1   | 8.2   | 6.4   | 4.4   | 3.2   | 1.5   | 0.0 | 0.1 |
| HIVRT                            | 56.2  | 35.0  | 3.1   | 2.1   | 0.4   | 1.2   | 1.2   | 0.4   | 0.1   | 0.0 | 0.5 |
| HMGR                             | 23.5  | 6.4   | 16.0  | 9.6   | 14.3  | 11.4  | 7.6   | 7.2   | 2.4   | 0.0 | 1.7 |
| InhA                             | 36.5  | 28.6  | 3.0   | 6.1   | 10.6  | 6.2   | 5.6   | 2.8   | 0.4   | 0.0 | 0.0 |
| NA                               | 0.8   | 33.1  | 20.9  | 8.4   | 10.2  | 10.5  | 10.5  | 2.6   | 1.2   | 0.9 | 1.0 |
| PARP                             | 1.9   | 13.1  | 8.3   | 35.0  | 15.5  | 11.4  | 9.7   | 4.4   | 0.8   | 0.0 | 0.0 |
| PNP                              | 11.7  | 24.7  | 13.0  | 18.7  | 13.0  | 7.7   | 4.7   | 6.3   | 0.3   | 0.0 | 0.0 |
| SAHH                             | 2.8   | 8.3   | 27.7  | 16.9  | 24.1  | 11.4  | 4.0   | 3.2   | 0.4   | 0.0 | 1.3 |

Figure S2: Percentage of pairwise ECFP4 Tanimoto similarities for the different protein datasets assigned to bins of increment 0.1.

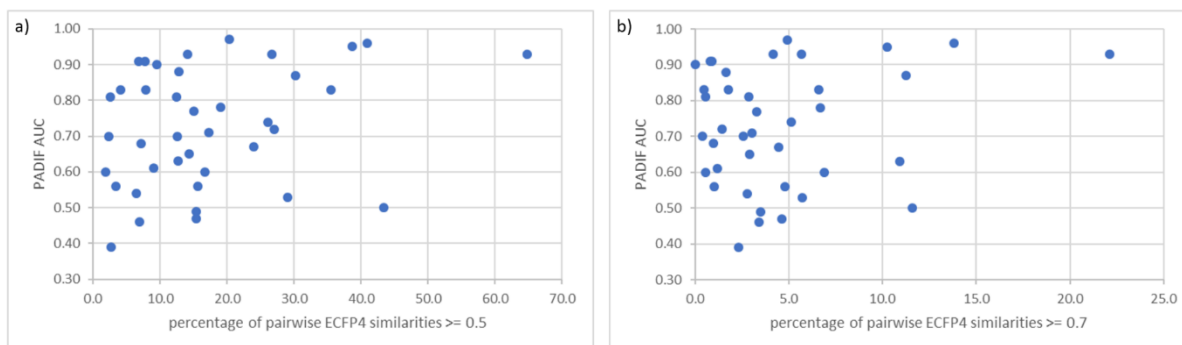

Figure S3: Plot of the PADIF AUC values versus the percentage of pairwise ligand ECFP4 similarities (a)  $\geq 0.5$  and (b)  $\geq 0.7$  for the different protein datasets.

## Bibliography

1. Rogers D, Hahn M. Extended-connectivity fingerprints. *J Chem Inf Model.* 2010;50:742–54.
2. Pipeline Pilot. Dassault Systèmes BIOVIA, Discovery Studio Modeling Environment, Release 2016, San Diego. 2016.
